# Supplementary material
Source: PubMed Central journal article supplement (PMC8312524)

# Supplemental Figure 1

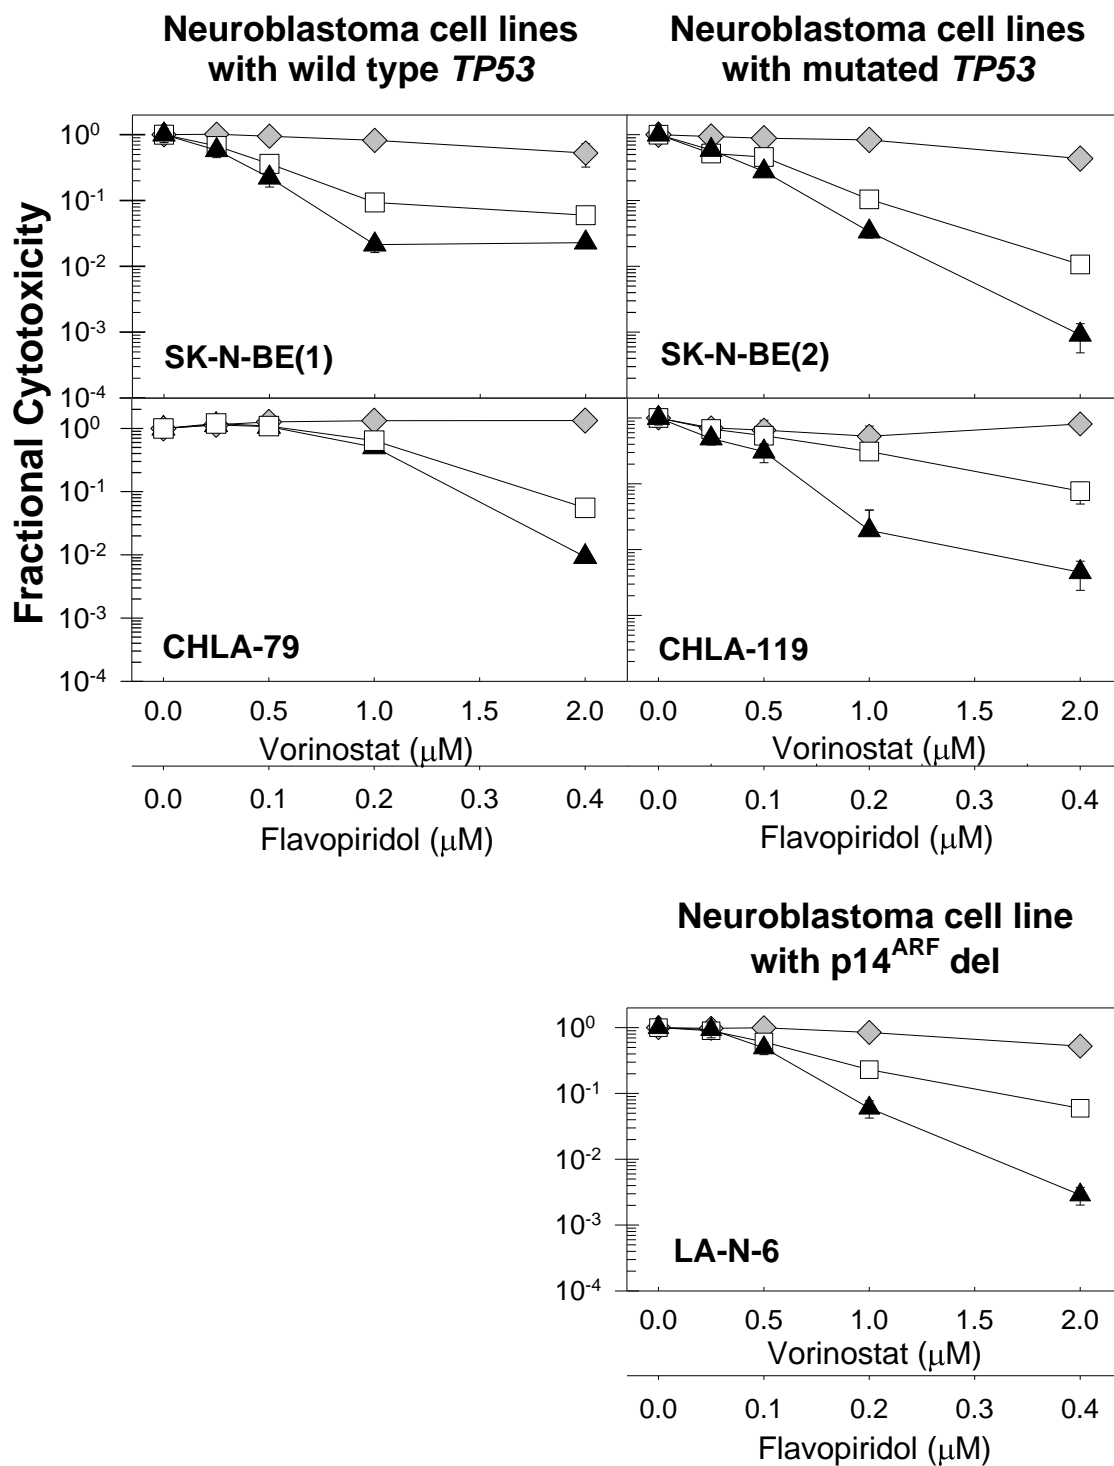



# Supplemental Figure 3

## A

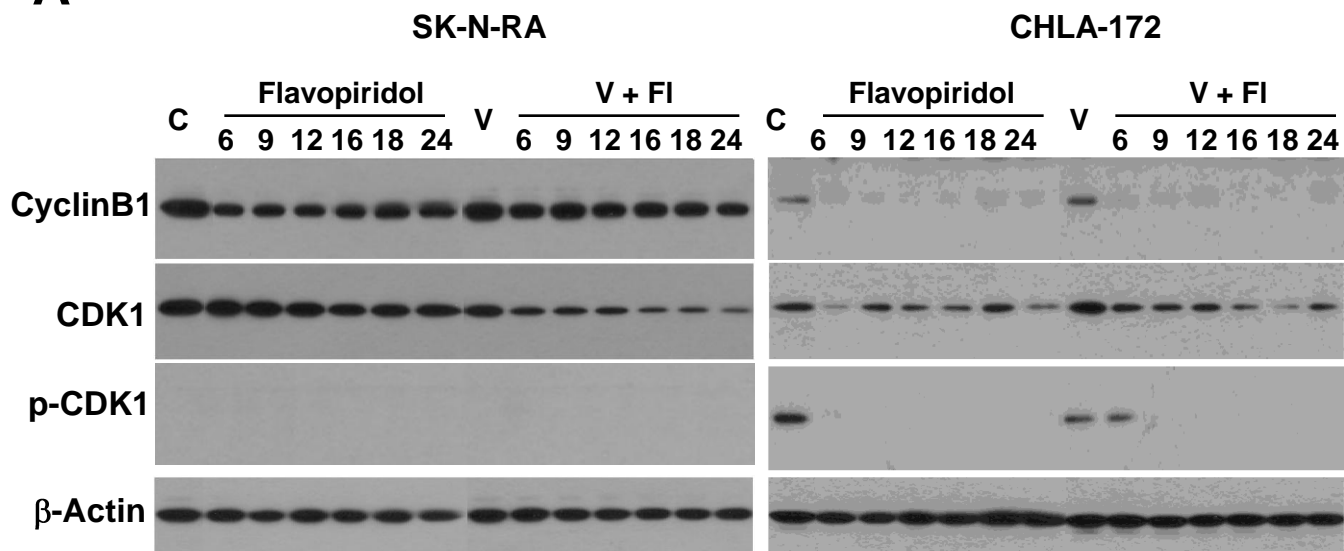

## B

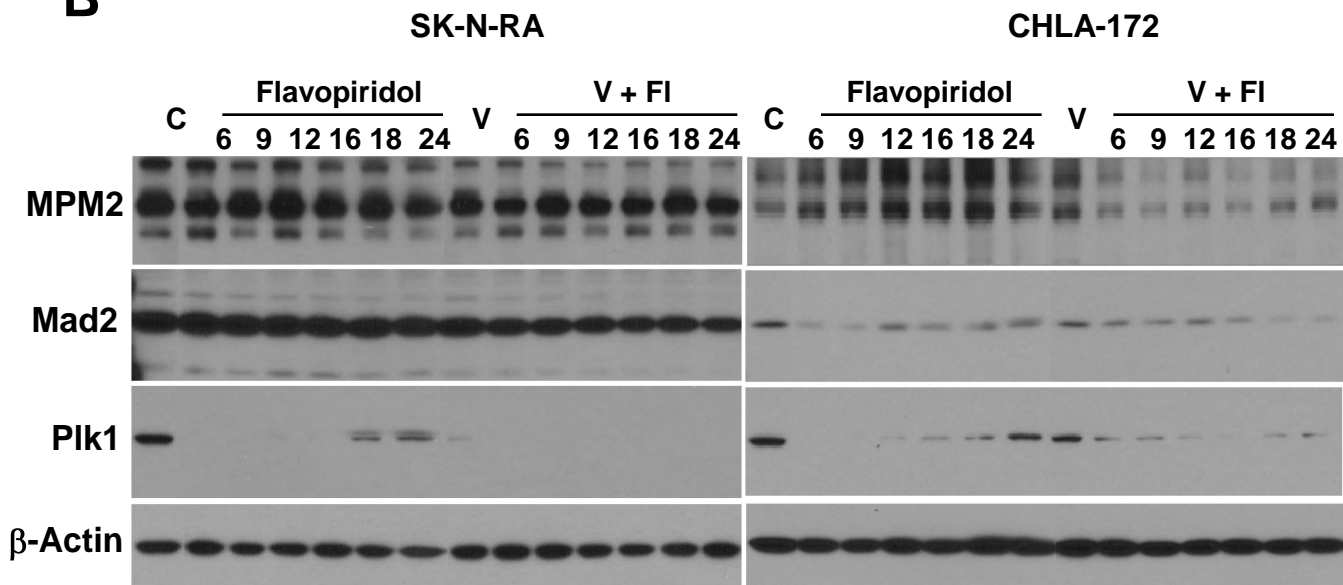

Supplement: NIHMS241278-supplement-1.pdf [file NIHMS241278-supplement-1.pdf]
